# Supplementary material for: Structural basis of an essential interaction between influenza polymerase and Pol II CTD
Source: Springer Nature journal article supplement (doi:10.1038/nature20594), 2016-12-20

## Uncropped gels with molecular markers

**Figure 3b.**

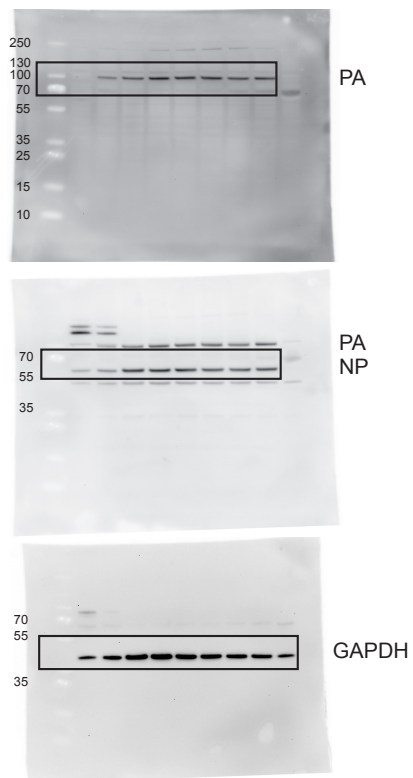

**Figure 3d.**

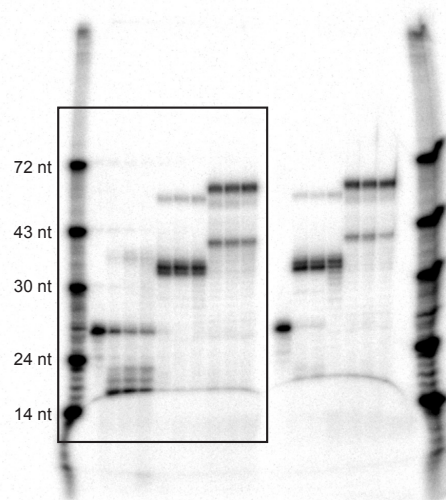

**Extended Figure 7a.**

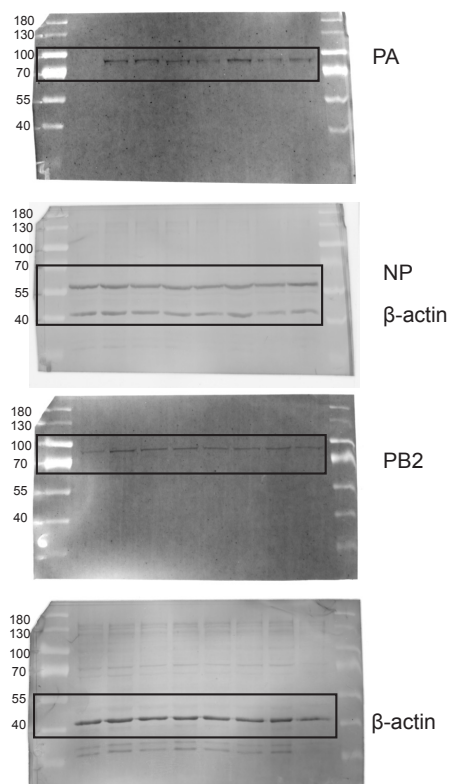

**Extended Figure 7b.**

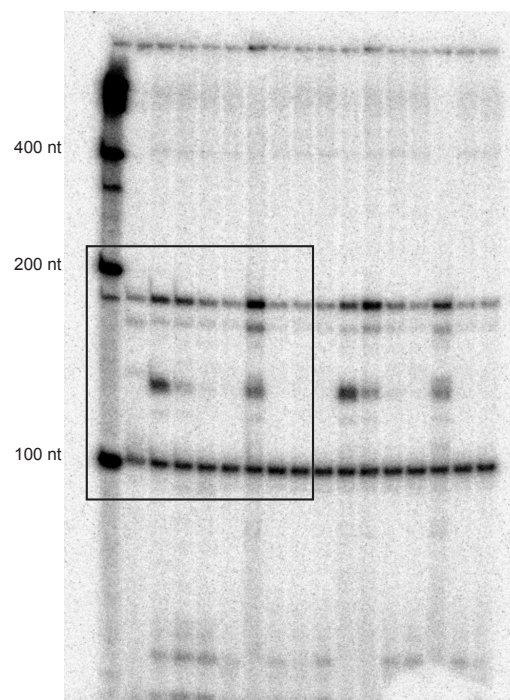

Supplement: 41586_2017_BFnature20594_MOESM273_ESM.pdf [file 41586_2017_BFnature20594_MOESM273_ESM.pdf]
